# Supplementary material
Source: HighWire-hosted journal article supplement (https://www.cmajopen.ca/highwire/filestream/80916/field_highwire_adjunct_files/0/open-2014-0088-1-at.pdf)

**Appendix 1 (as supplied by the authors): Percentage of 7-year-old students with an exemption to measles-containing vaccine during the 2012/13 school year, by public health unit.**

**Exemptions due to religious or conscientious belief**

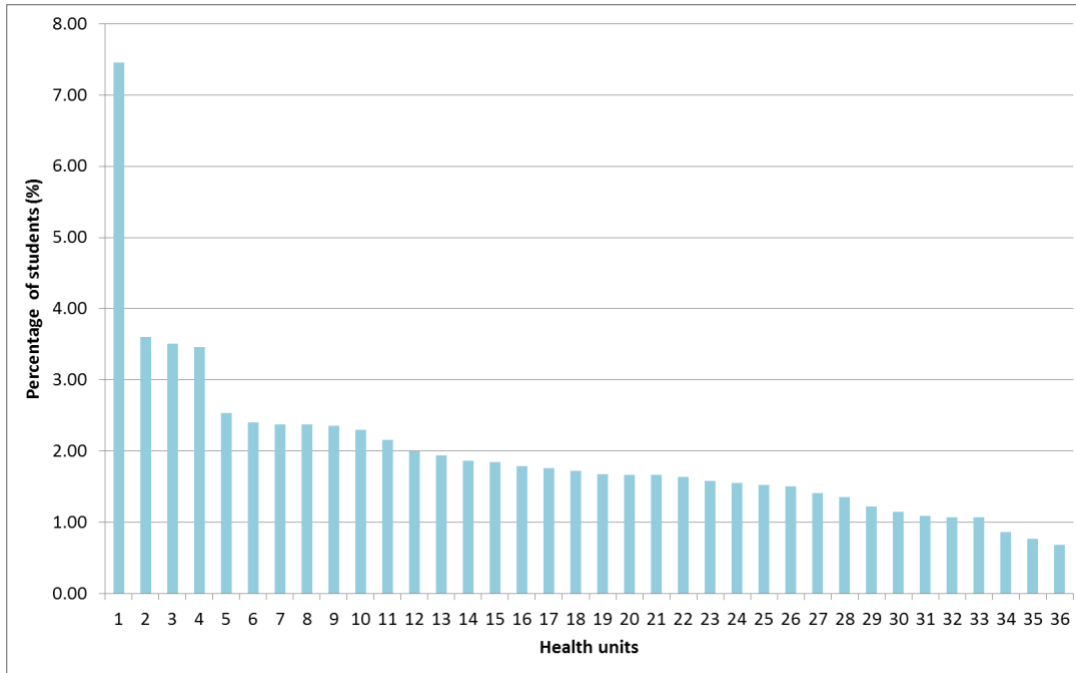

**Medical exemptions**

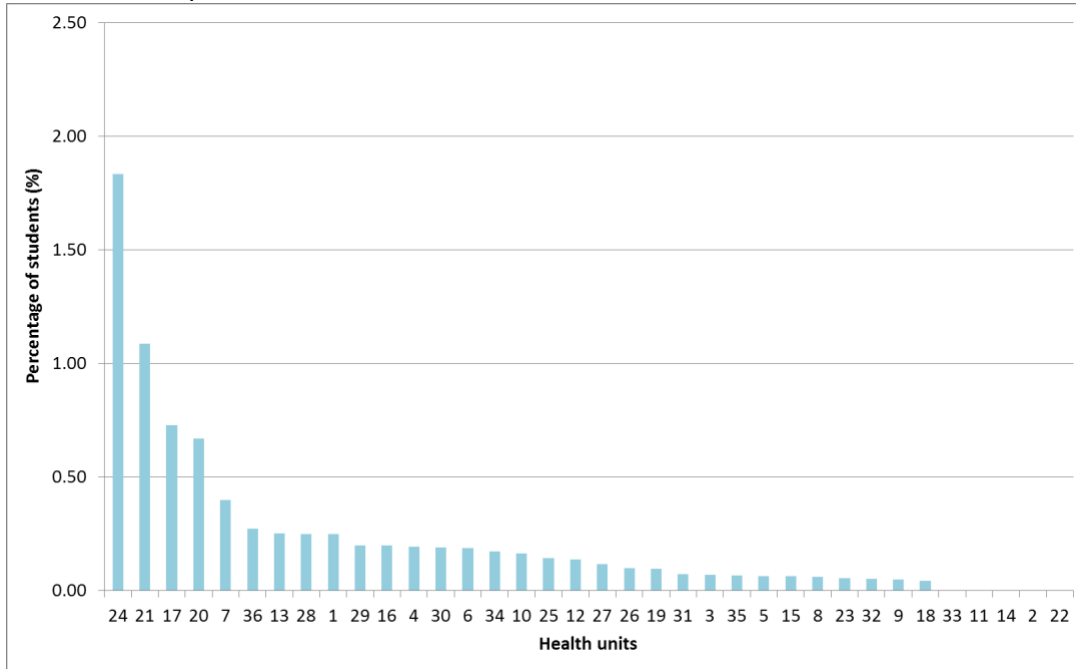

Supplement: open-2014-0088-1-at.pdf [file open-2014-0088-1-at.pdf]
